# Supplementary material
Source: publisher figshare collection journal article supplement (https://plos.figshare.com/articles/dataset/_/3431021)
Supplement: Supplementary file [file 1]

Supplementary Table 1: Graded levels of Etv5 mRNA expression in the mouse brain

| Site                                                            | Expression | Site                                         | Expression |
|-----------------------------------------------------------------|------------|----------------------------------------------|------------|
| <b>Telencephalon</b>                                            |            | Periventricular hypothalamic nu (Pe)         | –          |
| Medial septal nuclei (MS)                                       | –          | Posteror hypthoalamic nu (PH)                | –          |
| Ventral pallidum                                                | +          | Ventromedial hypothalamic nu, central (VMHC) | –          |
| <b>Amygdala</b>                                                 |            | <b>Thalamus</b>                              |            |
| Basolateral amygdaloid nu, anterior (BLA)                       | ++         | Angular thalamic nu (Ang)                    | –          |
| Basolateral amygdaloid nu, ventral (BLV)                        | ++         | Anterodorsal thalamic nu (AD)                | –          |
| Basolateral amygdaloid nu, posterior (BLP)                      | +          | Anteromedial thalamic nu (AM)                | –          |
| Basomedial amygdaloid nu, anterior (BMA)                        | +          | Anteroventral thalamic nu (AV)               | +          |
| Basomedial amygdaloid nu, posterior (BMP)                       | +          | Central medial thalamic nu (CM)              | –          |
| Central amygdaloid nu, capsular dic (CeC)                       | +          | Dorsal lateral geniculate nu (DLG)           | +          |
| Central amygdaloid nu, lateral div (CeL)                        | ++         | Ethmoid thalamic nu (Eth)                    | –          |
| Intercalated nu amygdala (I)                                    | –          | Interanterior dorsal thalamic nu (AD)        | +          |
| Lateral amygdaloid nu, dorsolateral (LaDL)                      | –          | Intermediodorsal thalamic nu (IMD)           | –          |
| Lateral amygdaloid nu, ventromedial (LaVM)                      | –          | Lat post thalamic nu, laterorostral (LPLR)   | +          |
|                                                                 |            | Lat post thalamic nu, medorostral (LPMR)     | +          |
|                                                                 |            | Lateral habenular nu (LHb)                   | –          |
|                                                                 |            | Laterodorsal thalamic nu (LD)                | +          |
|                                                                 |            | Mamillotalamic tract (mt)                    | –          |
|                                                                 |            | Medial habenular nu (MHb)                    | –          |
|                                                                 |            | Medial geniculate nu, dorsal (MGD)           | +          |
|                                                                 |            | Medial geniculate nu, ventral (MGV)          | +          |
|                                                                 |            | Mediodorsal thalamic nu (MD)                 | –          |
|                                                                 |            | Nigrostriatal nucleus                        | +++        |
|                                                                 |            | Oval paracentral nu (OPC)                    | –          |
|                                                                 |            | Paracentral thalamic nu (PC)                 | +          |
|                                                                 |            | Parafascicular thalamic nu (PF)              | –          |
|                                                                 |            | Parataenial thalamic nu (PT)                 | –          |
|                                                                 |            | Paraventricular thalamic nu (PV)             | +          |
|                                                                 |            | Posterior thalamic nu group (Po)             | +          |
|                                                                 |            | Posteromedian thalamic nu (PoMn)             | –          |
|                                                                 |            | Peticular thalamic nu (Rt)                   | –          |
|                                                                 |            | Reuniens thalamic nu (Re)                    | –          |
|                                                                 |            | Rhomboid thalamic nu (Rh)                    | –          |
|                                                                 |            | Stria medullaris, thalamus (STIA)            | +++        |
|                                                                 |            | Submedius thalamic nu (Sub)                  | +          |
|                                                                 |            | V posteromed thalamic, nu, parvicel (VPPC)   | +          |
|                                                                 |            | Ventral posterolat thalamic nu (VPL)         | +          |
|                                                                 |            | Ventral posteromed thalamic nu (VPM)         | +          |
|                                                                 |            | Ventral reunions thalamic nu (VRe)+          | –          |
|                                                                 |            | Ventrolateral geniculate nu (VLG)            | –          |
|                                                                 |            | Ventrolateral thalamic nu (VL)               | +          |
|                                                                 |            | Ventromed thalamic nu (VM)                   | +          |
|                                                                 |            | Zona inserta, dorsal (ZID)                   | –          |
|                                                                 |            | Zona inserta, ventral (ZIV)                  | –          |
| <b>Cerebral cortex</b>                                          |            |                                              |            |
| Dorsal endopiriform nu (DEn)                                    | +++        |                                              |            |
| Layer 1 (1)                                                     | –          |                                              |            |
| Layer 2 (2)                                                     | +          |                                              |            |
| Layer 3 (3)                                                     | –          |                                              |            |
| Layer 4 (4)                                                     | +++        |                                              |            |
| Layer 5 (5)                                                     | ++         |                                              |            |
| Layer 6 (6)                                                     | +++        |                                              |            |
| Piriform cortex (Pir)                                           | ++         |                                              |            |
| Ventral endopiriform nu (VEn)                                   | +++        |                                              |            |
| <b>Hippocampal formation</b>                                    |            |                                              |            |
| Granule layer, dentate gyrus (GrDG)                             | –          |                                              |            |
| Lacunosum molecular layer, hipp (LMol)                          | –          |                                              |            |
| Molecular layer dentate gyrus (Mol)                             | –          |                                              |            |
| Oriens layers, hippocampus (Or)                                 | +          |                                              |            |
| Polymorph layer, dentate gyrus (PoDG)                           | +          |                                              |            |
| Pyramidal cell layers, hippocampus (Py)                         | +++        |                                              |            |
| Stratum radiatum, hippocampus (Rad)                             | –          |                                              |            |
| <b>Diencephalon</b>                                             |            |                                              |            |
| <b>Hypothalamus</b>                                             |            |                                              |            |
| Arcuate hypothalamic nu, dorsal (ArcD)                          | +          |                                              |            |
| Arcuate hypothalamic nu, lateral (ArcL)                         | +          |                                              |            |
| Dorsomedial hypothalamic nu (DM)                                | +          |                                              |            |
| Lateral hypothalamic area (LH)                                  | +          |                                              |            |
| Paraventricular hypothalamic lateral, magnocellular part (PaLM) | +          |                                              |            |
| Paraventricular hypothalamic medial, magnocellular part (PAMM)  | +          |                                              |            |

| Site                                                | Expression |
|-----------------------------------------------------|------------|
| <b>Mesencephalon</b>                                |            |
| Central nu inferior colliculus (CIC)                | +          |
| Dorsal cortex, inferior colliculus (DCIC)           | +          |
| Dorsal raphe nu, inferior (DRI)                     | +          |
| Dorsal raphe, caudal part (DRC)                     | –          |
| Dorsal raphe nu, ventral (DRV)                      | –          |
| External cortex, inferior colliculus (ECIC)         | +          |
| <b>Pons</b>                                         |            |
| Kölliker-Fuse nu (KF)                               | +          |
| Laterodorsal tegment nu,<br>ventral (LDTgV)         | –          |
| Lateral parabrachial nu (LPB)                       | +          |
| Motor trigeminal nu (Mo5)                           | +          |
| Ventral tegmental nu (VTg)                          | +          |
| <b>Medulla</b>                                      |            |
| Ambiguus nu (Amb)                                   | +          |
| Area postrema (AP)                                  | –          |
| Dorsal motor nu vagus n (10)                        | +          |
| Fascial nu (7)                                      | –          |
| Gigantocellular reticular nu, alpha (GiA)           | +          |
| Hypoglossal nu (12)                                 | –          |
| Inferior olive, beta subnu (IOBe)                   | –          |
| Inferior olive, cap of Kooy med nu (IOK)            | +          |
| Inferior olive, dorsal accessory nu (IOD)           | –          |
| Inferior olive, dorsomed cell grp (IODM)            | –          |
| Inferior olive, dorsomed cell col (IODMC)           | –          |
| Inferior olive, med nu (IOM)                        | +          |
| Inferior olive, principal nu (IOPr)                 | +          |
| Inferior olive, subnu B of med nu (IOB)             | –          |
| Inferior olive, subnu C of med nu (IOC)             | +          |
| Medial vestibular nu (MVe)                          | –          |
| nu of solitary tract, commissural (SolC)            | –          |
| nu of solitary tract, dorsolateral<br>tract (SolDL) | +          |
| nu of solitary tract, medial (SolM)                 | –          |
| nu of solitary tract, ventrolateral (SolVL)         | –          |
| Prepositus hypoglossal nu (Pr)                      | +          |
| Pyramidal tract (py)                                | –          |
| Raphe magnus nu (RMg)                               | +          |
| Raphe obscurus nu (Rob)                             | +          |
| Raphe pallidus (RPa)                                | –          |
| Solitary tract (sol)                                | +          |
| <b>Cerebellum</b>                                   |            |
| Granular layer                                      | +          |
| Molecular layer                                     | –          |
| Purkinje cell layer                                 | +          |
